# Supplementary material for: Pennogenin 3-O-β-Chacotrioside Attenuates Hypertrophied Lipid Accumulation by Enhancing Mitochondrial Oxidative Capacity
Source: MDPI journal article supplement (doi:10.3390/ijms25052970), 2024-03-04
Supplement: s1 [file s1]

**Table S1.** Oligonucleotide sequences used in RT-PCR analysis.

| Target gene                     | Direction | Sequence (5'-3')         | Annealing temperatures | GenBank accession |
|---------------------------------|-----------|--------------------------|------------------------|-------------------|
| <i>Ppar<math>\gamma</math></i>  | forward   | GCGGGCTGAGAAGTCACGTT     | 58 °C                  | NM_001127330.3    |
|                                 | reverse   | CCATCACGGAGAGGTCCACA     |                        |                   |
| <i>C/ebp<math>\alpha</math></i> | forward   | TACCGAGTAGGGGGAGCA       | 55 °C                  | NM_001287514.1    |
|                                 | reverse   | TCATTTTTCTCACGGGGGCC     |                        |                   |
| <i>Fasn</i>                     | forward   | AGAAGCCATGTGGGAAGATT     | 56 °C                  | NM_007988.3       |
|                                 | reverse   | AGCAGGGACAGGACAAGACAA    |                        |                   |
| <i>Acly</i>                     | forward   | CTTGGGCCGGAACAAAA        | 55 °C                  | NM_001199296.1    |
|                                 | reverse   | GCCGAGGTGGTGCAGAT        |                        |                   |
| <i>Acca</i>                     | forward   | AGAAACCCGAACAGTGGAAGT    | 55 °C                  | NM_133360.3       |
|                                 | reverse   | AGGTAGCCCTTCACGGTTAAA    |                        |                   |
| <i>Fabp4</i>                    | forward   | GGGAACCTGGAAGCTTGTCT     | 55 °C                  | NM_001409514.1    |
|                                 | reverse   | ACTCTCTGACCGGATGGTGA     |                        |                   |
| <i>Scd1</i>                     | forward   | TTCTTGCGATACACTCTGGTGC   | 55 °C                  | NM_009127.4       |
|                                 | reverse   | CGGGATTGAATGTTCTTGTCTG   |                        |                   |
| <i>Dgat1</i>                    | forward   | GGCCCAAGGTAGAAGAGGAC     | 55 °C                  | NM_010046.4       |
|                                 | reverse   | GATCAGCATCACCACACACC     |                        |                   |
| <i>Pgc1<math>\alpha</math></i>  | forward   | AAGTGGTGTAGCGACCAATCG    | 55 °C                  | NM_008904.3       |
|                                 | reverse   | AATGAGGGCAATCCGTCTTCA    |                        |                   |
| <i>Cpt1a</i>                    | forward   | CTCCGCCTGAGCCATGAAG      | 55 °C                  | NM_013495.2       |
|                                 | reverse   | CACCAGTGATGCCATTCT       |                        |                   |
| <i>Rplp0</i>                    | forward   | AGGTCCTCCTTGGTGAAC       | 52 °C                  | NM_007475.5       |
|                                 | reverse   | GTGCTGATGGGCAAGAAC       |                        |                   |
| <i>Gapdh</i>                    | forward   | AGTATGACTCCACTCACGGCAAAT | 56 °C                  | NM_001411843.1    |
|                                 | reverse   | GTCTCGCTCCTGGAAGATGGT    |                        |                   |
| <i>nDNA H19</i>                 | forward   | GAACAGAAGCATTCTAGGCTGG   | 55 °C                  | NR_130974.1       |
|                                 | reverse   | TTCTAAGTGAATTACGGTGGGTG  |                        |                   |
| <i>MT-Cyb</i>                   | forward   | ACGCAAACGGAGCCTCAATA     | 55 °C                  | NC_005089.13      |
|                                 | reverse   | TGTGGCTATGACTGCGAACA     |                        |                   |
| <i>MT-Atp6</i>                  | forward   | CCAATGGCATTAGCAGTCCG     | 55 °C                  | NC_005089.1       |
|                                 | reverse   | AATGGTAGCTGTTGGTGGGC     |                        |                   |

Note: peroxisome proliferator-activated receptor- $\gamma$ , Ppar- $\gamma$ ; CCAAT/enhancer-binding protein  $\alpha$ , C/ebp $\alpha$ ; fatty acid synthase, Fasn; ATP-citrate lyase, Acly; acetyl-coA Carboxylase  $\alpha$ , Acca; fatty acid-binding protein 4, Fabp4; stearyl-Coenzyme A desaturase 1, Scd1; diacylglycerol O-acyltransferase 1, Dgat1; Peroxisome proliferator-activated receptor  $\gamma$  coactivator 1  $\alpha$ , Pgc1 $\alpha$ ; carnitine palmitoyltransferase 1A, Cpt1a; Ribosomal protein lateral stalk subunit P0, Rplp0; Glyceraldehyde-3-phosphate dehydrogenase, Gapdh. Nuclear DNA H19, nDNA H19; Mitochondrially Encoded Cytochrome B, MT-Cyb; Mitochondrially Encoded ATP Synthase Membrane Subunit 6, MT-Atp6.
